# Supplementary material for: Direct synthesis of self-assembled ZSM-5 microsphere with controllable mesoporosity and its enhanced LDPE cracking properties
Source: Royal Society of Chemistry journal article supplement (doi:10.1039/c6ra03047e), 2016-01-01
Supplement: c6ra03047e1.pdf [file c6ra03047e1.pdf]

## Electronic Supplementary Information

### (ESI)

Table S1 The SiO<sub>2</sub>/Al<sub>2</sub>O<sub>3</sub> and solid yields of ZM-X samples

| Samples | SiO <sub>2</sub> /Al <sub>2</sub> O <sub>3</sub> | Solid yield (%) |
|---------|--------------------------------------------------|-----------------|
| ZM-1    | 30                                               | 92.32           |
| ZM-2    | 28                                               | 90.23           |
| ZM-3    | 26                                               | 86.56           |
| ZM-4    | 27                                               | 86.69           |
| ZM-5    | 25                                               | 83.69           |

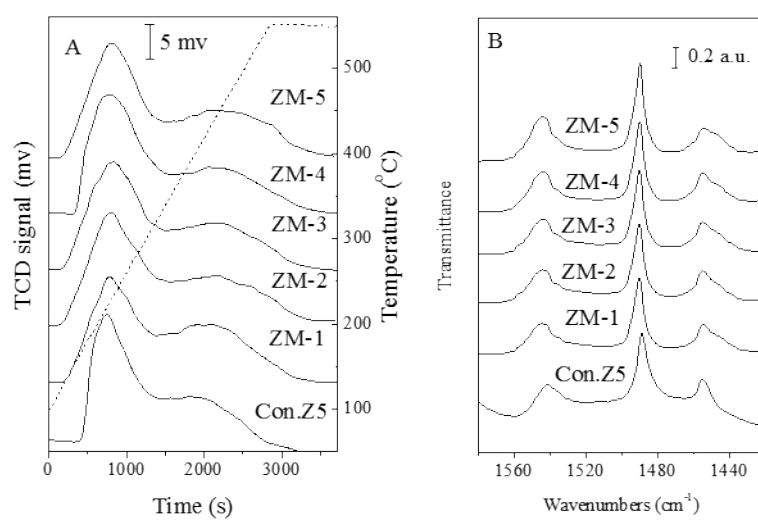

**Figure S1** The  $\text{NH}_3$ -TPD profiles (A) pyridine-FTIR spectra collected at 100 °C (B)

**Table S2 The acidic properties data of NH<sub>3</sub>-TPD and pyridine/collidine-FTIR**

| Samples | NH <sub>3</sub> -TPD                    |                  | pyridine-FTIR (100 °C)                     |                               |      | collidine-FTIR (100 °C)                                         |                                                           |                                            |                                                  |
|---------|-----------------------------------------|------------------|--------------------------------------------|-------------------------------|------|-----------------------------------------------------------------|-----------------------------------------------------------|--------------------------------------------|--------------------------------------------------|
|         | Concentration of acid sites             | S/W <sup>a</sup> | Concentration of B acid sites <sup>b</sup> | Concentration of L acid sites | B/L  | A <sup>c</sup> 1633 cm <sup>-1</sup><br>[a.u.cm <sup>-1</sup> ] | A 1639 & 1650 cm <sup>-1</sup><br>[a.u.cm <sup>-1</sup> ] | Concentration of B acid sites <sup>d</sup> | B <sub>coll</sub> /B <sub>pyd</sub> <sup>e</sup> |
|         | [μmol NH <sub>3</sub> g <sup>-1</sup> ] |                  | [μmol pyd g <sup>-1</sup> ]                | [μmol pyd g <sup>-1</sup> ]   |      |                                                                 |                                                           | [μmol coll g <sup>-1</sup> ]               | [μmol coll/μmol pyd]                             |
| Con.Z5  | 758                                     | 1.35             | 291                                        | 140                           | 2.09 | /                                                               | /                                                         | /                                          | /                                                |
| ZM-1    | 832                                     | 1.59             | 307                                        | 153                           | 2.00 | 4.13                                                            | 0.21                                                      | 66                                         | 0.21                                             |
| ZM-2    | 812                                     | 1.56             | 318                                        | 166                           | 1.92 | 7.00                                                            | 0.32                                                      | 102                                        | 0.32                                             |
| ZM-3    | 821                                     | 1.54             | 318                                        | 174                           | 1.83 | 8.76                                                            | 0.38                                                      | 121                                        | 0.38                                             |
| ZM-4    | 866                                     | 1.66             | 343                                        | 172                           | 1.99 | 3.5                                                             | 0.15                                                      | 50                                         | 0.15                                             |
| ZM-5    | 875                                     | 1.73             | 380                                        | 169                           | 2.25 | 3.16                                                            | 0.12                                                      | 45                                         | 0.12                                             |

<sup>a</sup> the ratio of strong acid amount to weak acid amount

<sup>b</sup> calculated with the the corresponding extinction coefficients (Brønsted: 1.67 cm/μmol; Lewis: 2.22 cm/μmol)

<sup>c</sup> the area of the bands integration in collidine FTIR sprctra.

<sup>e</sup> calculated with the the corresponding extinction coefficients (Brønsted: 8.1 cm/μmol)

<sup>d</sup> the proportion of external Brønsted acid sites concentration detected by collidine absorption in bulky Brønsted acid sites concentration detected by pyridine absorption.

**Table S3 The conversion of IPB over the Con Z5 and hierarchical zeolite microspheres**

| Samples | Conversion (%) <sup>a</sup> |
|---------|-----------------------------|
| Con.Z5  | 92.6                        |
| ZM-1    | 95.3                        |
| ZM-2    | 97.6                        |
| ZM-3    | 96.9                        |
| ZM-4    | 96.1                        |
| ZM-5    | 95.3                        |

<sup>a</sup> Conversion(Conv.) = 100% – area percent of reactant and its isomers calculated by normalization method.

The cracking reaction of isopropylbenzene (IPB, 97%, Aldrich) was evaluated in a micro-reactor with a quartz-tube of 6 mm inner diameter. 50 mg of 20–60 mesh zeolite ZSM-5 pellets without a binder was pretreated at 510 °C for 60 min in a stream of N<sub>2</sub> before reaction. Maintaining the catalyst at the scheduled temperature, 0.5 μL substrate was injected into the catalyst bed with N<sub>2</sub> from the top of the reactor. The flow of the carrier gas is 80 mL min<sup>-1</sup>. The IPB cracking products were analyzed by an on-line gas chromatograph of GC-9800A (Shanghai Kechuang, FFAP capillary column, 30 m × 0.25 mm × 0.25 μm) equipped with a flame ionization detector.

**Table S4 The performance of LDPE cracking**

| Samples             | Reaction temperature /°C | Conversion /% | Selectivity /% |                |                |                |                |                                 |                                  |                              |
|---------------------|--------------------------|---------------|----------------|----------------|----------------|----------------|----------------|---------------------------------|----------------------------------|------------------------------|
|                     |                          |               | C <sub>1</sub> | C <sub>2</sub> | C <sub>3</sub> | C <sub>4</sub> | C <sub>5</sub> | C <sub>6</sub> -C <sub>12</sub> | C <sub>13</sub> -C <sub>16</sub> | C <sub>16</sub> <sup>+</sup> |
| LDPE-T <sub>1</sub> | 340                      | 5.11          | /              | /              | /              | /              | /              | /                               | /                                | /                            |
| LDPE-T <sub>2</sub> | 400                      | 19.23         | 0.36           | 1.78           | 4.65           | 4.85           | 6.23           | 40.04                           | 22.69                            | 19.40                        |
| Con.Z5              | 340                      | 37.85         | 0.02           | 0.26           | 9.53           | 19.09          | 28.51          | 34.13                           | 5.86                             | 2.60                         |
| ZM-1                | 340                      | 75.32         | 0.04           | 0.77           | 8.77           | 14.06          | 9.06           | 47.72                           | 11.82                            | 7.75                         |
| ZM-2                | 340                      | 79.32         | 0.02           | 0.36           | 7.90           | 13.14          | 7.37           | 53.07                           | 12.89                            | 5.26                         |
| ZM-3                | 340                      | 82.88         | 0.03           | 0.37           | 7.41           | 11.65          | 6.54           | 51.34                           | 15.56                            | 7.17                         |
| ZM-4                | 340                      | 73.25         | 0.03           | 0.47           | 9.52           | 14.96          | 8.41           | 46.69                           | 11.46                            | 5.91                         |
| ZM-5                | 340                      | 66.32         | 0.01           | 0.64           | 9.53           | 16.04          | 14.57          | 45.96                           | 8.44                             | 4.81                         |

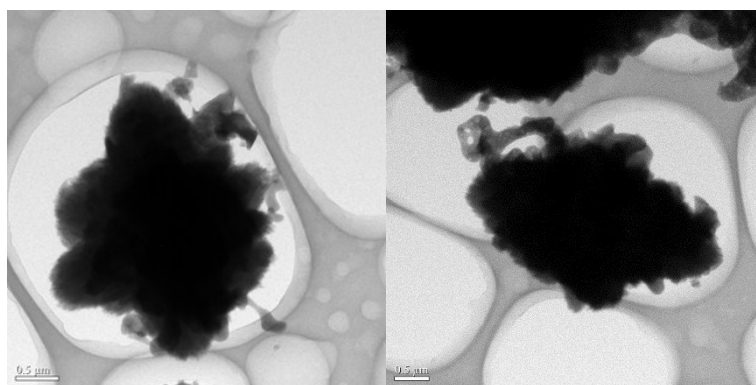

**Figure S2 The TEM images of ZM-3 intermediate at crystallization of 28 h**

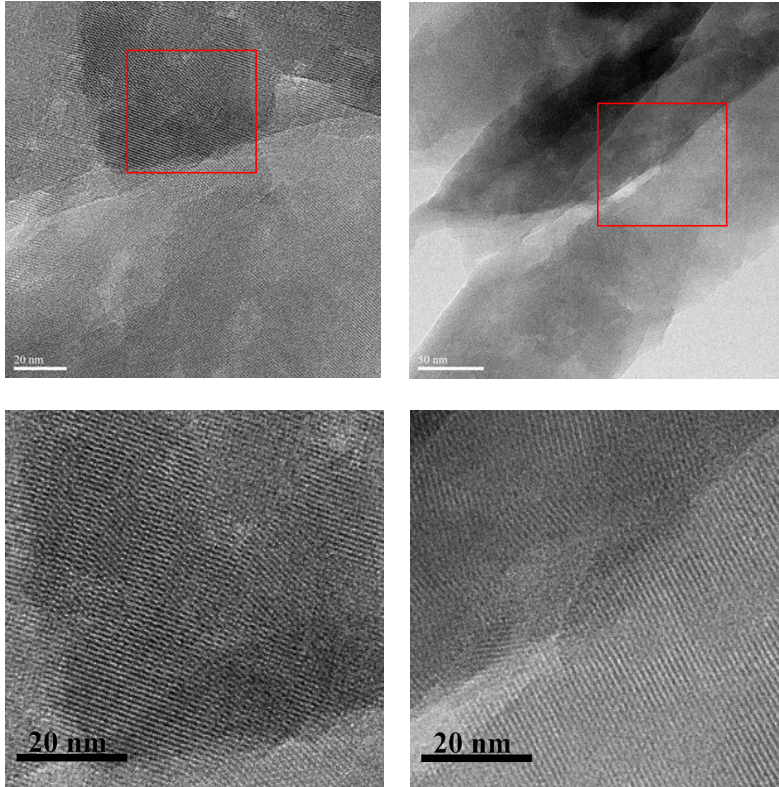

**Figure S3 The TEM images of ZM-3 inner section**
